# Supplementary material for: Development and Assessment of a Clinical Calculator for Estimating the Likelihood of Recurrence and Survival Among Patients With Locally Advanced Rectal Cancer Treated With Chemotherapy, Radiotherapy, and Surgery
Source: PubMed Central journal article supplement (PMC8576585; doi:10.1001/jamanetworkopen.2021.33457), 2021-11-08
Supplement: jamanetwopen-e2133457-s002.pdf [file jamanetwopen-e2133457-s002.pdf]

\*Indicates required information. Only first name, last name, and suffix will appear in PubMed.

| <b>*Group Name(s): Colorectal Cancer Disease Management Team of Memorial Sloan Kettering Cancer Center</b> |                   |                              |                  |                                        |                                          |                                                         |                                                                                            |
|------------------------------------------------------------------------------------------------------------|-------------------|------------------------------|------------------|----------------------------------------|------------------------------------------|---------------------------------------------------------|--------------------------------------------------------------------------------------------|
| <b>*First Name and Middle Initial(s)</b>                                                                   | <b>*Last Name</b> | <b>*Suffix (eg, Jr, III)</b> | Academic Degrees | Institution                            | Location (city, state/province, country) | Role or Contribution, eg, chair, principal investigator | Group (if more than 1 Group listed in the byline) and/or Subgroup (eg, Steering Committee) |
| Fiyinfolu                                                                                                  | Balogun           |                              | MD               | Memorial Sloan Kettering Cancer Center | New York, NY, USA                        |                                                         |                                                                                            |
| David                                                                                                      | Bates             |                              | MD               | Memorial Sloan Kettering Cancer Center | New York, NY, USA                        |                                                         |                                                                                            |
| Delia                                                                                                      | Calo              |                              | MD               | Memorial Sloan Kettering Cancer Center | New York, NY, USA                        |                                                         |                                                                                            |
| Louise                                                                                                     | Connell           |                              | MD               | Memorial Sloan Kettering Cancer Center | New York, NY, USA                        |                                                         |                                                                                            |
| John                                                                                                       | Cuaron            |                              | MD               | Memorial Sloan Kettering Cancer Center | New York, NY, USA                        |                                                         |                                                                                            |
| Avni                                                                                                       | Desai             |                              | MD               | Memorial Sloan Kettering Cancer Center | New York, NY, USA                        |                                                         |                                                                                            |
| Natally                                                                                                    | deSouza Horvat    |                              | MD               | Memorial Sloan Kettering Cancer Center | New York, NY, USA                        |                                                         |                                                                                            |
| Imane                                                                                                      | El Dika           |                              | MD               | Memorial Sloan Kettering Cancer Center | New York, NY, USA                        |                                                         |                                                                                            |
| Maria                                                                                                      | El Homsy          |                              | MD               | Memorial Sloan Kettering Cancer Center | New York, NY, USA                        |                                                         |                                                                                            |
| David                                                                                                      | Felek             |                              | MD               | Memorial Sloan Kettering Cancer Center | New York, NY, USA                        |                                                         |                                                                                            |
| J. Louis                                                                                                   | Fuqua             | III                          | MD               | Memorial Sloan Kettering Cancer Center | New York, NY, USA                        |                                                         |                                                                                            |
| Karuna                                                                                                     | Ganesh            |                              | MD               | Memorial Sloan Kettering Cancer Center | New York, NY, USA                        |                                                         |                                                                                            |
| Hans                                                                                                       | Gerdes            |                              | MD               | Memorial Sloan Kettering Cancer Center | New York, NY, USA                        |                                                         |                                                                                            |
| Zoe                                                                                                        | Goldberg          |                              | MD               | Memorial Sloan Kettering Cancer Center | New York, NY, USA                        |                                                         |                                                                                            |
| Jennifer                                                                                                   | Golia Pernicka    |                              | MD               | Memorial Sloan Kettering Cancer Center | New York, NY, USA                        |                                                         |                                                                                            |
| Carla                                                                                                      | Hajj              |                              | MD               | Memorial Sloan Kettering Cancer Center | New York, NY, USA                        |                                                         |                                                                                            |
| Jaclyn                                                                                                     | Hechtman          |                              | MD               | Memorial Sloan Kettering Cancer Center | New York, NY, USA                        |                                                         |                                                                                            |
| Dennis                                                                                                     | Hsu               |                              | MD               | Memorial Sloan Kettering Cancer Center | New York, NY, USA                        |                                                         |                                                                                            |
| Sidra                                                                                                      | Javed-Tayyab      |                              | MD               | Memorial Sloan Kettering Cancer Center | New York, NY, USA                        |                                                         |                                                                                            |
| Nancy                                                                                                      | Kemeny            |                              | MD               | Memorial Sloan Kettering Cancer Center | New York, NY, USA                        |                                                         |                                                                                            |

## Supplemental Online Content: Nonauthor Collaborators

\*Indicates required information. Only first name, last name, and suffix will appear in PubMed.

| *First Name and Middle Initial(s) | *Last Name  | *Suffix (eg, Jr, III) | Academic Degrees | Institution                            | Location (city, state/province, country) | Role or Contribution, eg, chair, principal investigator | Group (if more than 1 Group listed in the byline and/or Subgroup (eg, Steering Committee)) |
|-----------------------------------|-------------|-----------------------|------------------|----------------------------------------|------------------------------------------|---------------------------------------------------------|--------------------------------------------------------------------------------------------|
| Jia                               | Li          |                       | MD               | Memorial Sloan Kettering Cancer Center | New York, NY, USA                        |                                                         |                                                                                            |
| Emmy                              | Ludwig      |                       | MD               | Memorial Sloan Kettering Cancer Center | New York, NY, USA                        |                                                         |                                                                                            |
| Robin                             | Mendelsohn  |                       | MD               | Memorial Sloan Kettering Cancer Center | New York, NY, USA                        |                                                         |                                                                                            |
| Parisa                            | Momtaz      |                       | MD               | Memorial Sloan Kettering Cancer Center | New York, NY, USA                        |                                                         |                                                                                            |
| Garrett                           | Nash        |                       | MD               | Memorial Sloan Kettering Cancer Center | New York, NY, USA                        |                                                         |                                                                                            |
| Makoto                            | Nishimura   |                       | MD               | Memorial Sloan Kettering Cancer Center | New York, NY, USA                        |                                                         |                                                                                            |
| Maliha                            | Nusrat      |                       | MD               | Memorial Sloan Kettering Cancer Center | New York, NY, USA                        |                                                         |                                                                                            |
| Emmanouil                         | Pappou      |                       | MD               | Memorial Sloan Kettering Cancer Center | New York, NY, USA                        |                                                         |                                                                                            |
| Viktoria                          | Paroder     |                       | MD               | Memorial Sloan Kettering Cancer Center | New York, NY, USA                        |                                                         |                                                                                            |
| Philip                            | Paty        |                       | MD               | Memorial Sloan Kettering Cancer Center | New York, NY, USA                        |                                                         |                                                                                            |
| Iva                               | Petkovska   |                       | MD               | Memorial Sloan Kettering Cancer Center | New York, NY, USA                        |                                                         |                                                                                            |
| Nitya                             | Raj         |                       | MD               | Memorial Sloan Kettering Cancer Center | New York, NY, USA                        |                                                         |                                                                                            |
| Diane                             | Reidy       |                       | MD               | Memorial Sloan Kettering Cancer Center | New York, NY, USA                        |                                                         |                                                                                            |
| Marsha                            | Reyngold    |                       | MD               | Memorial Sloan Kettering Cancer Center | New York, NY, USA                        |                                                         |                                                                                            |
| Michael                           | Roehrl      |                       | MD               | Memorial Sloan Kettering Cancer Center | New York, NY, USA                        |                                                         |                                                                                            |
| Juan                              | Schvartzman |                       | MD               | Memorial Sloan Kettering Cancer Center | New York, NY, USA                        |                                                         |                                                                                            |

## Supplemental Online Content: Nonauthor Collaborators

\*Indicates required information. Only first name, last name, and suffix will appear in PubMed.

| *First Name and Middle Initial(s) | *Last Name  | *Suffix (eg, Jr, III) | Academic Degrees | Institution                            | Location (city, state/province, country) | Role or Contribution, eg, chair, principal investigator | Group (if more than 1 Group listed in the byline and/or Subgroup (eg, Steering Committee)) |
|-----------------------------------|-------------|-----------------------|------------------|----------------------------------------|------------------------------------------|---------------------------------------------------------|--------------------------------------------------------------------------------------------|
| Mark                              | Schattner   |                       | MD               | Memorial Sloan Kettering Cancer Center | New York, NY, USA                        |                                                         |                                                                                            |
| Neil                              | Segal       |                       | MD               | Memorial Sloan Kettering Cancer Center | New York, NY, USA                        |                                                         |                                                                                            |
| Armin                             | Shahrokni   |                       | MD               | Memorial Sloan Kettering Cancer Center | New York, NY, USA                        |                                                         |                                                                                            |
| Marina                            | Shcherba    |                       | MD               | Memorial Sloan Kettering Cancer Center | New York, NY, USA                        |                                                         |                                                                                            |
| Moshe                             | Shike       |                       | MD               | Memorial Sloan Kettering Cancer Center | New York, NY, USA                        |                                                         |                                                                                            |
| J. Joshua                         | Smith       |                       | MD               | Memorial Sloan Kettering Cancer Center | New York, NY, USA                        |                                                         |                                                                                            |
| Zsofia                            | Stadler     |                       | MD               | Memorial Sloan Kettering Cancer Center | New York, NY, USA                        |                                                         |                                                                                            |
| Ryan                              | Sugarman    |                       | MD               | Memorial Sloan Kettering Cancer Center | New York, NY, USA                        |                                                         |                                                                                            |
| Efsevia                           | Vakiani     |                       | MD               | Memorial Sloan Kettering Cancer Center | New York, NY, USA                        |                                                         |                                                                                            |
| Iris                              | Wei         |                       | MD               | Memorial Sloan Kettering Cancer Center | New York, NY, USA                        |                                                         |                                                                                            |
| Maria                             | Widmar      |                       | MD               | Memorial Sloan Kettering Cancer Center | New York, NY, USA                        |                                                         |                                                                                            |
| Elizabeth                         | Won         |                       | MD               | Memorial Sloan Kettering Cancer Center | New York, NY, USA                        |                                                         |                                                                                            |
| Abraham                           | Wu          |                       | MD               | Memorial Sloan Kettering Cancer Center | New York, NY, USA                        |                                                         |                                                                                            |
| Rona                              | Yaeger      |                       | MD               | Memorial Sloan Kettering Cancer Center | New York, NY, USA                        |                                                         |                                                                                            |
| Alice                             | Zervoudakis |                       | MD               | Memorial Sloan Kettering Cancer Center | New York, NY, USA                        |                                                         |                                                                                            |
| Melissa                           | Zinovoy     |                       | MD               | Memorial Sloan Kettering Cancer Center | New York, NY, USA                        |                                                         |                                                                                            |
